# Supplementary material for: Solvothermal synthesis of GO/V2O5 composites as a cathode material for rechargeable magnesium batteries
Source: Royal Society of Chemistry journal article supplement (doi:10.1039/c5ra15284d), 2015-01-01
Supplement: c5ra15284d1.pdf [file c5ra15284d1.pdf]

Electronic Supplementary Information

## **Solvothermal synthesis of GO/V<sub>2</sub>O<sub>5</sub> composite as cathode material for rechargeable magnesium batteries**

Xinchuan Du,<sup>ac</sup> Gang Huang<sup>ac</sup>, Yuling Qin<sup>ac</sup> and Limin Wang<sup>ab\*</sup>

*<sup>a</sup> State Key Laboratory of Rare Earth Resource Utilization,  
Changchun Institute of Applied Chemistry, Chinese Academy of  
Sciences, Changchun 130022, Jilin, China*

*E-mail: lmwang@ciac.ac.cn; Fax: +86 431 85262836; Tel: +86  
431 85262447*

*<sup>b</sup> Changzhou Institute of Energy Storage Materials & Devices,  
Changzhou 213000, Jiangsu, China*

*<sup>c</sup> University of the Chinese Academy of Sciences, Beijing 100049,  
China*

## Experimental

**Synthesis of GO/V<sub>2</sub>O<sub>5</sub> composites.** The GO/V<sub>2</sub>O<sub>5</sub> composites synthetic route is illustrated in Fig. 1. 10 mg of graphene oxides (GO), which was freeze-dried for 24h, was dispersed in 35 mL of isopropanol (IPA) by ultrasonication for 2h, followed by addition of 200  $\mu$ L of vanadium oxytriisopropoxide (VOT) to form a homogeneous solution. Finally, all the mixture solution was transferred into a 50 mL Teflon-lined stainlesssteel autoclave, sealed and heated in an oven at 200 °C for 12h. The precipitate was collected by centrifugation, washed thoroughly with isopropanol (IPA) and deionized water several times. Ultimately, GO/V<sub>2</sub>O<sub>5</sub> composites were obtained from a calcinating process at 800 °C in Ar.

**Synthesis of electrolyte.** The electrolyte solution of rechargeable Mg batteries comprises THF and a 0.25 M complex electrolyte of the Mg(AlCl<sub>2</sub>BuEt)<sub>2</sub> formal stoichiometry, which was prepared by reacting MgBu<sub>2</sub> and AlCl<sub>2</sub>Et at a ratio of 1:2 in THF solution.<sup>1</sup>

**Synthesis of GO.** Using an improved method of Hummers' method to prepare graphitic oxide (GO),<sup>2,3</sup> the product was freeze-dried to reserve.

### Calculation of the specific capacity.

Based on the equation mentioned in the paper:

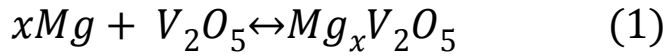

The theoretical specific capacity ( $C_0$ ):

$$C_0 = \frac{N_A \times e \times z \times m}{t \times M_W} \quad (2)$$

The specific capacity of GO/ $V_2O_5$  composite (when the  $x = 0.66$ , the most hosts<sup>4</sup>):

$$C_0 = \frac{6.02 \times 10^{23} \text{ mol}^{-1} \times 1.6 \times 10^{-19} \text{ C} \times 2 \times 182 \text{ g}}{3600 \text{ s} \times h^{-1} \times 182 \text{ g}}$$

Then as-prepared GO/ $V_2O_5$  composite as cathode material for rechargeable Mg batteries could host how much ( $y$ ) Mg ions per formula unit.

$$y = \frac{178 \text{ mAh/g}}{194 \text{ mAh/g}} \times 0.66 = 0.60$$

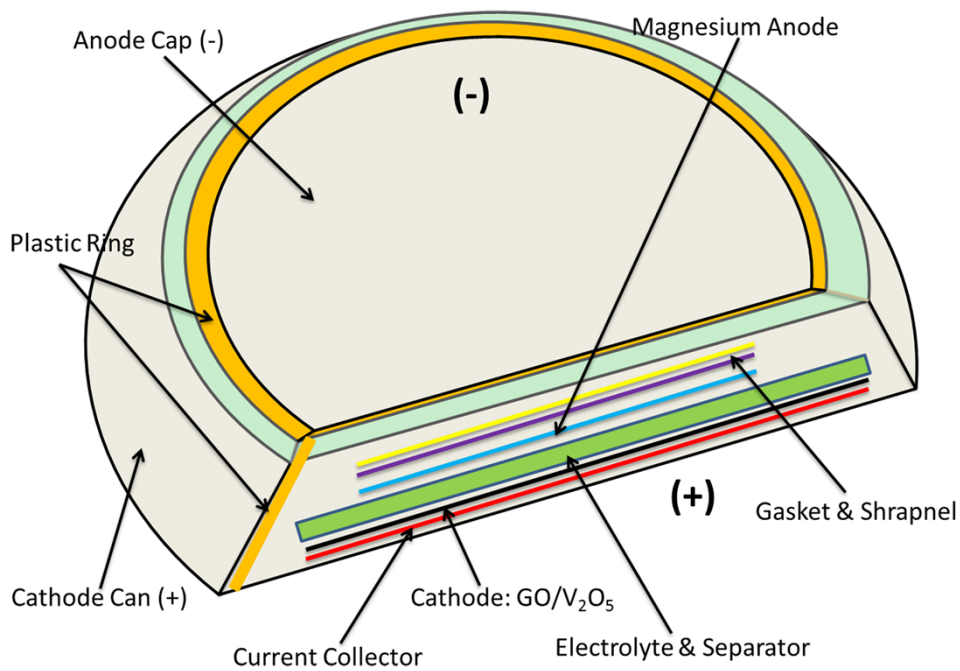

**Figure S1.** Schematic illustration of experimental battery.

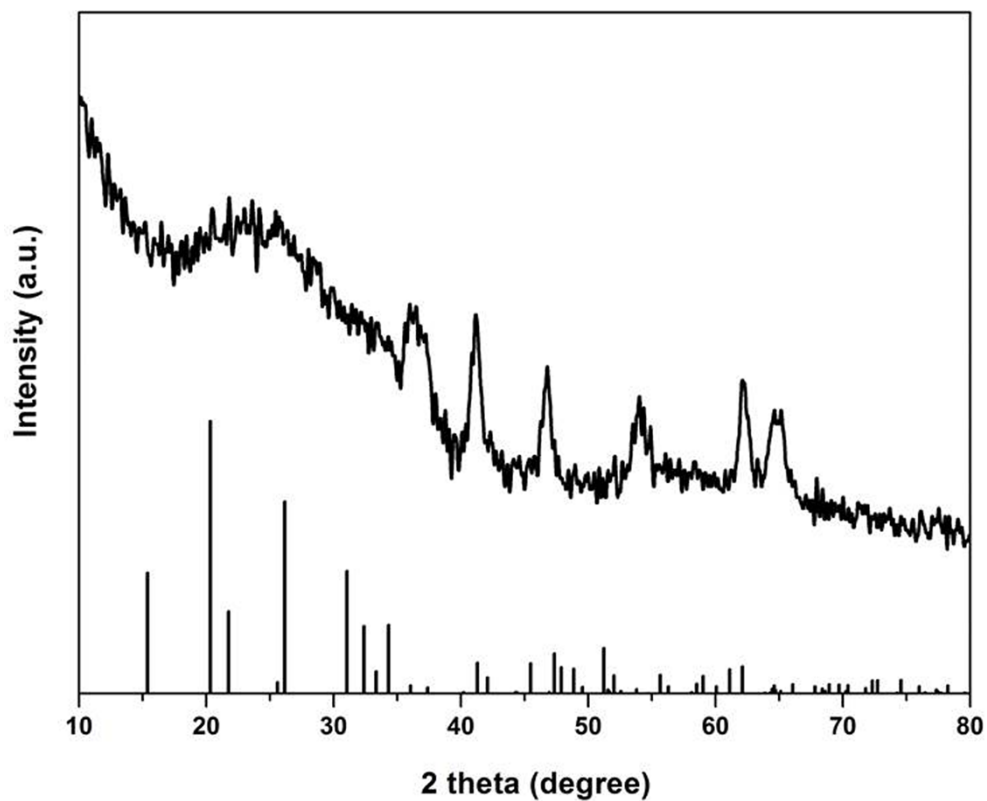

**Figure S2.** The X-ray diffraction (XRD) pattern of as-synthesized precursors of GO/V<sub>2</sub>O<sub>5</sub> composites.

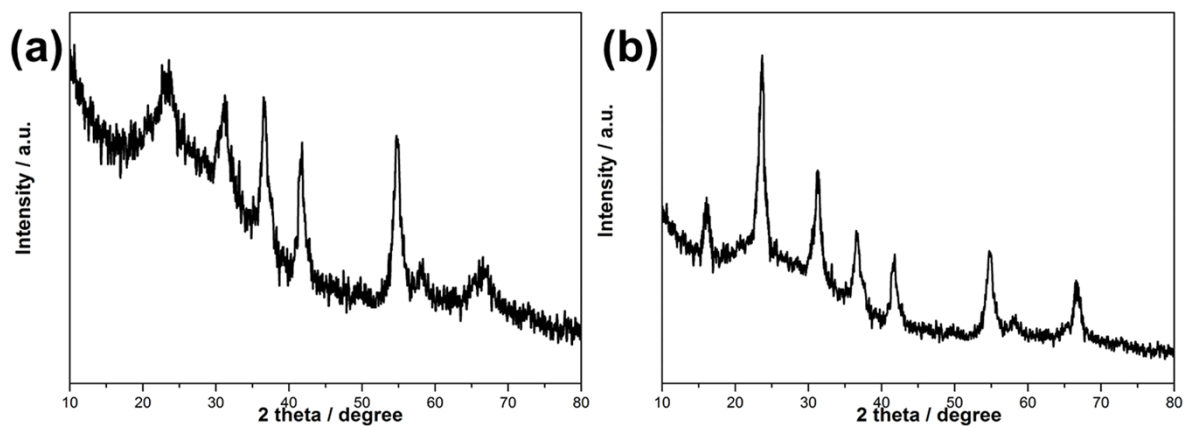

**Figure S3.** XRD patterns of GO/V<sub>2</sub>O<sub>5</sub> composites calcined at 400 °C (a) and 600 °C (b).

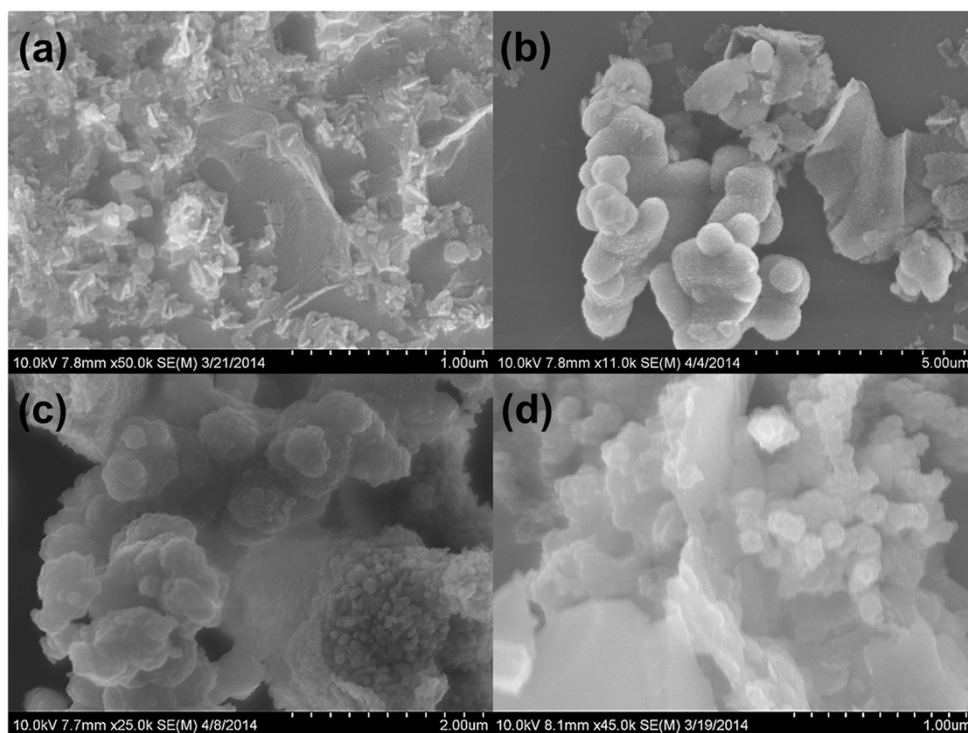

**Figure S4.** SEM images of GO/V<sub>2</sub>O<sub>5</sub> composites calcined at 400 °C (a) (b) and 600 °C (c) (d).

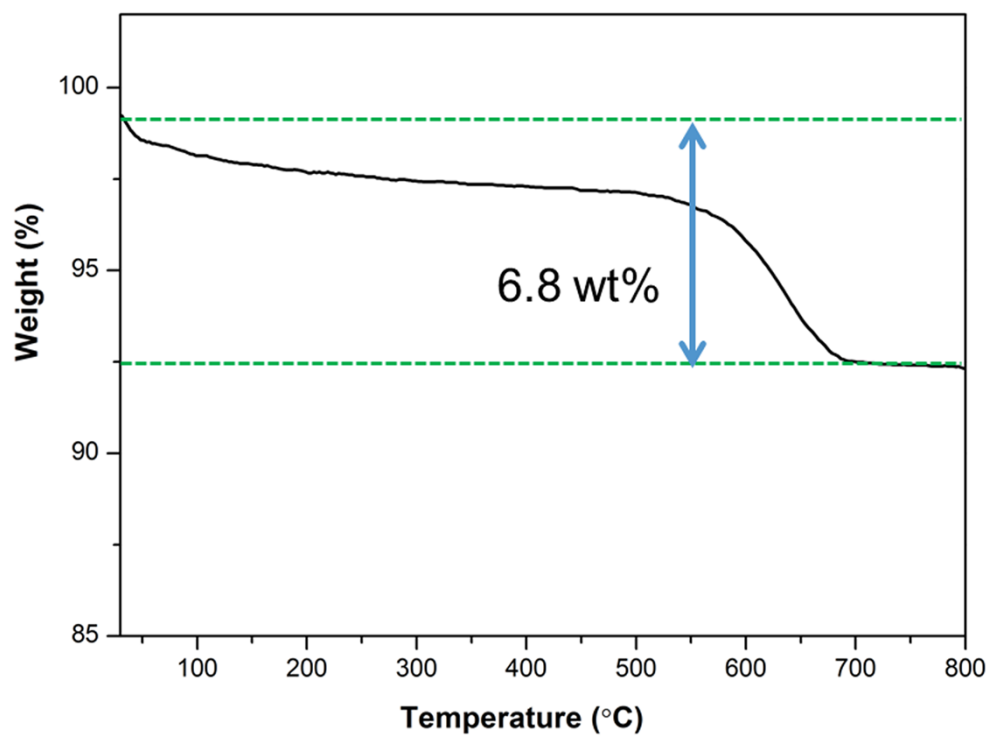

**Figure S5.** TG curve of GO/V<sub>2</sub>O<sub>5</sub> composites followed the heat treatment process from R.T. to 800 °C at a heating rate of 10 °C min<sup>-1</sup>.

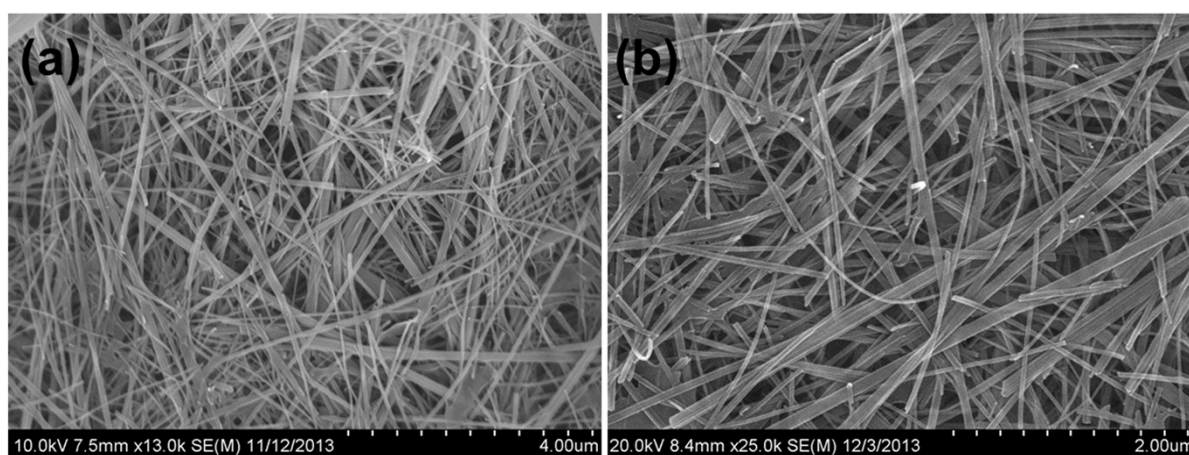

**Figure S6.** SEM images of V<sub>2</sub>O<sub>5</sub> prepared without GO.

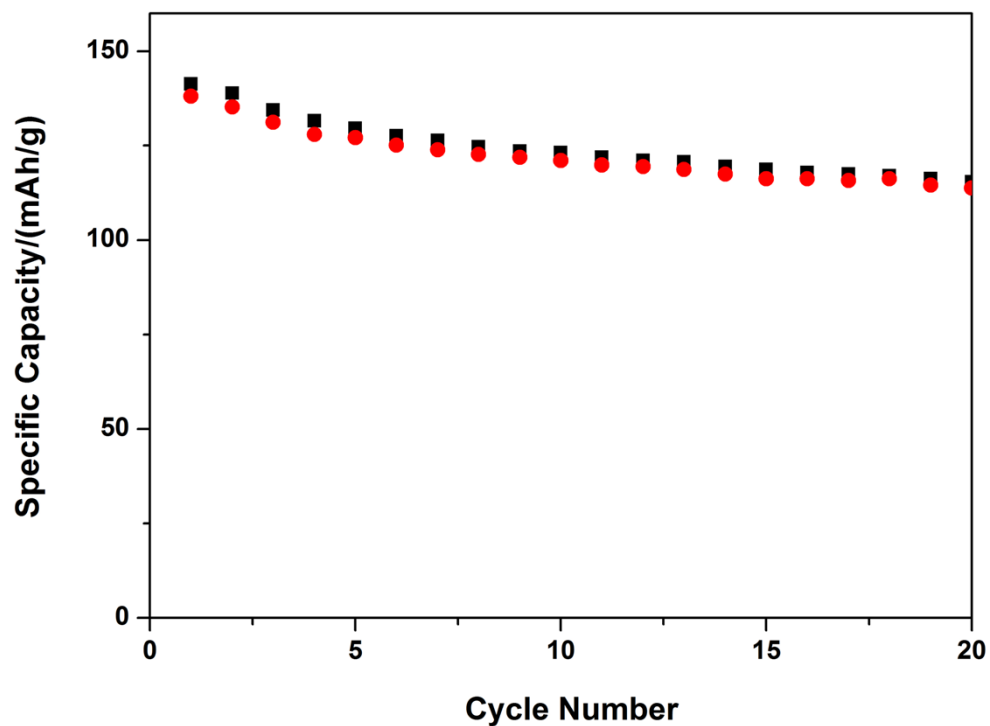

*Figure S7.* Electrochemical properties of  $V_2O_5$  prepared without GO.

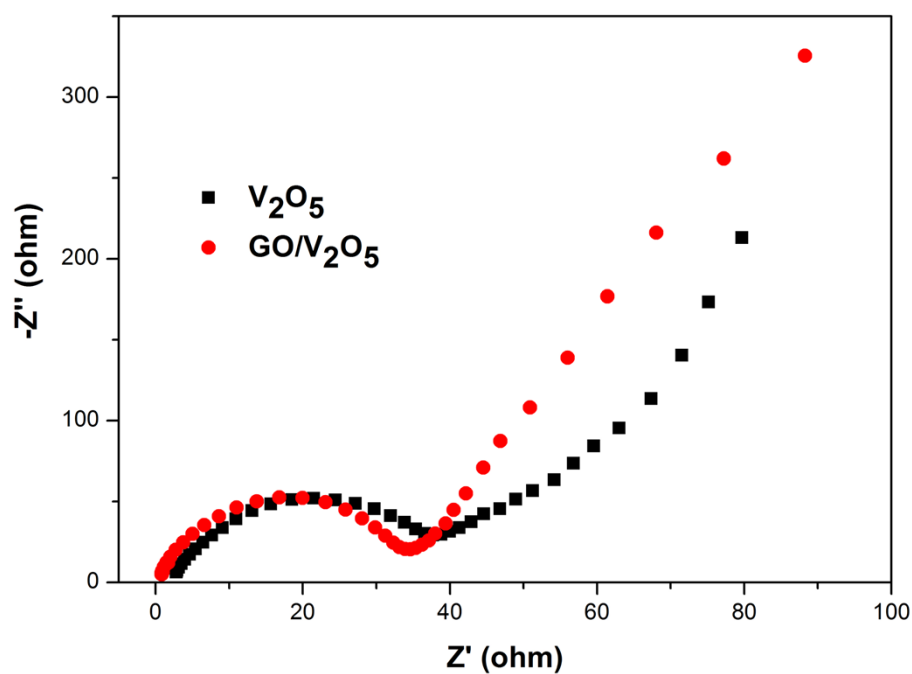

*Figure S8.* Electrochemical impedance spectra for the samples of  $V_2O_5$  and  $GO/V_2O_5$  electrodes.

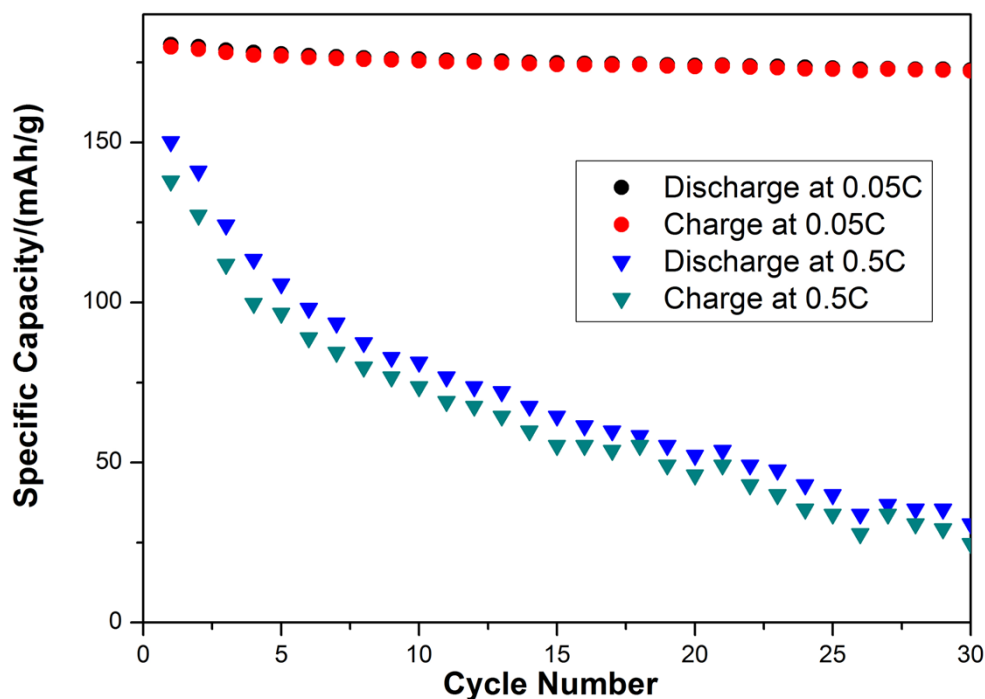

**Figure S9.** Cycling performance of GO/V<sub>2</sub>O<sub>5</sub> electrodes at different rates.

**Table S1.** Cycling performance of GO/V<sub>2</sub>O<sub>5</sub> composites and previously reported V<sub>2</sub>O<sub>5</sub>-based materials for Mg batteries.

| Type of materials                                        | Capacity (mAh/g)                           | Rate                   | Electrolyte                                                  | Ref.             |
|----------------------------------------------------------|--------------------------------------------|------------------------|--------------------------------------------------------------|------------------|
| V <sub>2</sub> O <sub>5</sub>                            | 194 (theoretical)                          | —                      | 1.0M Mg(ClO <sub>4</sub> ) <sub>2</sub> /THF                 | <b>5</b>         |
| V <sub>2</sub> O <sub>5</sub> /TC <sub>25</sub>          | 170 <sup>1st</sup>                         | 0.02 mV/s              | 1.0M Mg(ClO <sub>4</sub> ) <sub>2</sub> /H <sub>2</sub> O/AN | <b>6</b>         |
| V <sub>2</sub> O <sub>5</sub> /H <sub>2</sub> O aerogels | —                                          | 0.1 mV/s               | 1.0M LiClO <sub>4</sub> /PC                                  | <b>7</b>         |
| V <sub>2</sub> O <sub>5</sub> nanotubes                  | 80 <sup>1st</sup>                          | 1.0 mA/g               | 0.25M Mg(AlCl <sub>2</sub> EtBu) <sub>2</sub> /THF           | <b>8</b>         |
| Cu <sub>0.1</sub> VO <sub>x</sub> nanotubes              | 170 <sup>1st</sup>                         | 10 mA/g                | 0.25M Mg(AlCl <sub>2</sub> EtBu) <sub>2</sub> /THF           | <b>9</b>         |
| V <sub>2</sub> O <sub>5</sub> film                       | 146 <sup>1st</sup>                         | 0.5 μA/cm <sup>2</sup> | 0.1M MgTFSI <sub>2</sub> /AN                                 | <b>10</b>        |
| VOCl/C                                                   | 60/53 <sup>rd</sup>                        | 5.0 mA/g               | 0.5M PP <sub>14</sub> Cl/PP <sub>14</sub> TFSI               | <b>11</b>        |
| GO/V <sub>2</sub> O <sub>5</sub>                         | 178 <sup>1st</sup><br>140/20 <sup>th</sup> | 0.2 C                  | 0.25M Mg(AlCl <sub>2</sub> EtBu) <sub>2</sub> /THF           | <b>This work</b> |



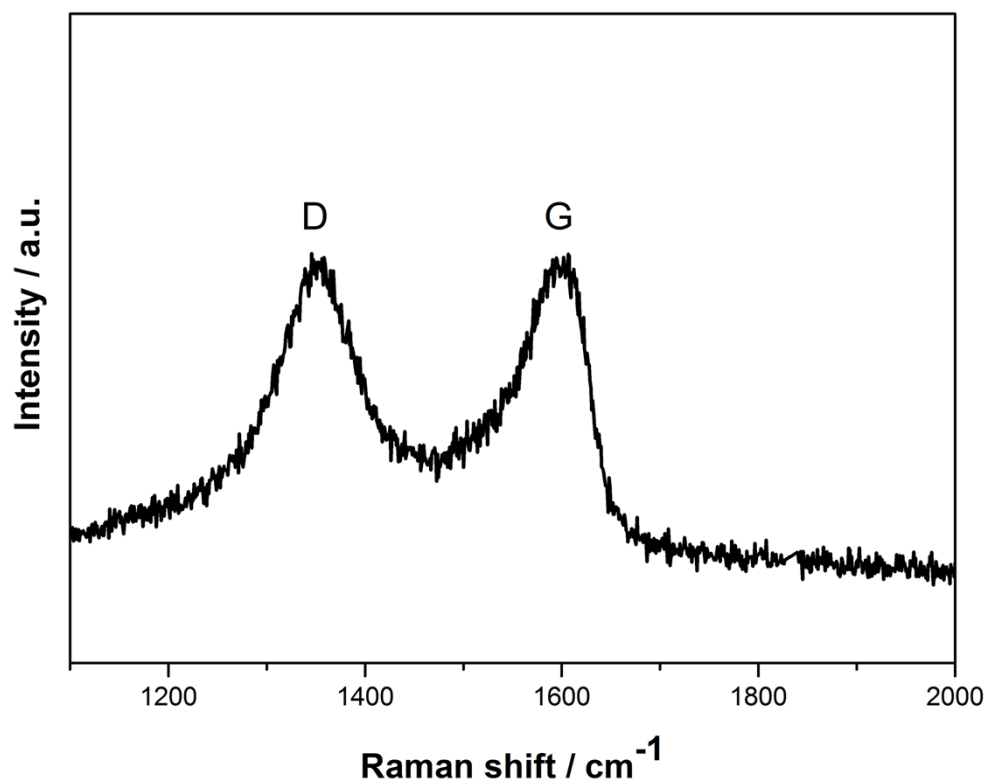

*Figure S10.* Raman spectra of GO in GO/V<sub>2</sub>O<sub>5</sub> composites calcined at 800 °C.

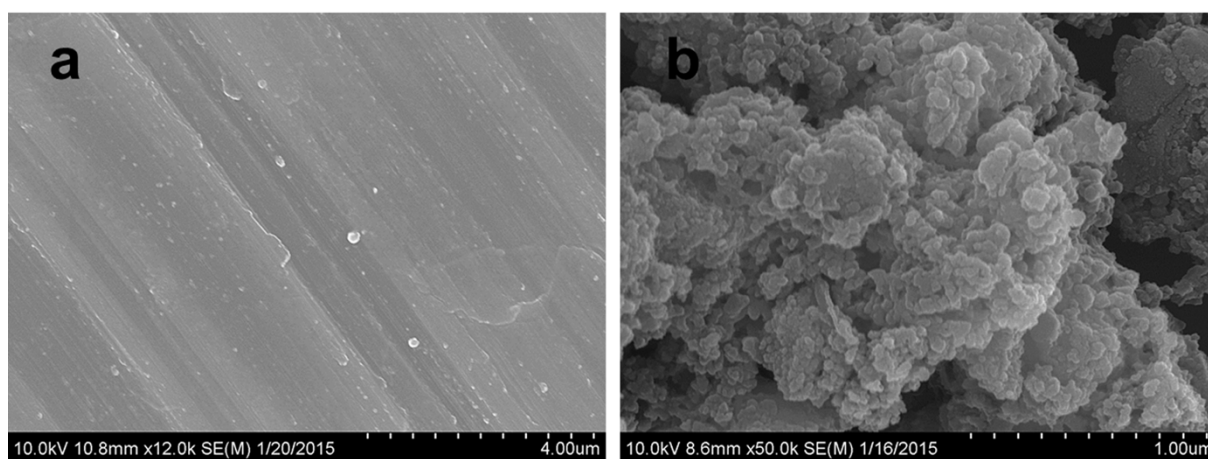

*Figure S11.* SEM images of (a) Mg anode and (b) GO/V<sub>2</sub>O<sub>5</sub> composite cathode after 20<sup>th</sup>.

## Reference:

1. D. Aurbach, Z. Lu, A. Schechter, Y. Gofer, H. Gizbar, R. Turgeman, Y. Cohen, M. Moshkovich and E. Levi, *Nature*, 2000, **407**, 724.
2. S. William, Hummers and Richard E Offeman, *J. Am. Chem. Soc.*, 1958, **80**, 1339.
3. D. C. Marcano, D. V. Kosynkin, J. M. Berlin, A. Sinitskii, Z. Z. Sun, A. Slesarev, L. B. Alemany, W. Lu and J. M. Tour, *ACS Nano.*, 2010, **4**, 4806.
4. J. Muldoon, C. B. Bucur, and T. Gregory, *Chem. Rev.*, 2014, **114**, 683.
5. D. Gregory, J. Hoffman and C. Winterton, *J. Electrochem. Soc.*, 1990, **137**, 775.
6. L. Jiao, H. Yuan, Y. Si, Y. Wang and Y. Wang, *Electrochem. Commun.*, 2006, **8**, 1041.
7. L. Jiao, H. Yuan, Y. Wang, J. Cao and Y. Wang, *Electrochem. Commun.*, 2005, **7**, 431.
8. D. B. Le, S. Passerini, F. Coustier, J. Guo, T. Soderstrom, B. B. Owens and W. H. Smyrl, *Chem. Mater.*, 1998, **10**, 682.
9. P. Novák and J. Desilvestro, *J. Electrochem. Soc.*, 1993, **140**, 140.
10. G. Gershinsky, H. Yoo, Y. Gofer and D. Aurbach, *Langmuir*, 2013, **29**, 10964.
11. P. Gao, X. Zhao, Z. Zhao-Karger, T. Diemant, R. Behm and M. Fichtner, *ACS Appl Mater Interfaces.*, 2014, **6**, 22430.
